# Supplementary material for: Reconstructing Source-Sink Dynamics in a Population with a Pelagic Dispersal Phase
Source: PubMed Central journal article supplement (PMC4023943; doi:10.1371/journal.pone.0095316), 2014-05-16
Supplement: pone.0095316.s009.pdf [file pone.0095316.s009.pdf]

**Table S1.** Sensitivity analysis: model fitting results based on "shifted" ROM outputs, with the rate of shifting  $\alpha = 0\%$  to  $20\%$ , with increments  $5\%$ . Since the age patterns estimated from the shifted data are identical to that based on the original data, we only report the nonzero parameter estimates.

|           |          | Pre-1990 Period  |       |       |       |  |
|-----------|----------|------------------|-------|-------|-------|--|
|           | Original | 5%               | 10%   | 15%   | 20%   |  |
| $m_1$     | 1.650    | 1.617            | 1.610 | 1.624 | 1.617 |  |
| $m_2$     | 0.160    | 0.161            | 0.161 | 0.162 | 0.163 |  |
| $m_3$     | 0.496    | 0.496            | 0.497 | 0.498 | 0.497 |  |
| $m_4$     | 0.156    | 0.157            | 0.157 | 0.156 | 0.156 |  |
| $v_{3,1}$ | 0.070    | 0.056            | 0.053 | 0.066 | 0.066 |  |
| $v_{6,1}$ | 0.930    | 0.944            | 0.947 | 0.934 | 0.934 |  |
| $v_{1,2}$ | 1.000    | 1.000            | 1.000 | 1.000 | 1.000 |  |
| $v_{4,3}$ | 0.079    | 0.079            | 0.080 | 0.080 | 0.080 |  |
| $v_{7,3}$ | 0.921    | 0.921            | 0.920 | 0.920 | 0.920 |  |
| $v_{5,4}$ | 1.000    | 1.000            | 1.000 | 1.000 | 1.000 |  |
|           |          | Post-1990 Period |       |       |       |  |
|           | Original | 5%               | 10%   | 15%   | 20%   |  |
| $m_1$     | 2.764    | 2.790            | 2.778 | 2.781 | 2.865 |  |
| $m_2$     | 0.625    | 0.624            | 0.625 | 0.626 | 0.626 |  |
| $m_3$     | 1.784    | 1.853            | 1.990 | 1.941 | 1.769 |  |
| $m_4$     | 1.715    | 1.666            | 1.631 | 1.614 | 1.557 |  |
| $v_{3,1}$ | 0.110    | 0.107            | 0.110 | 0.109 | 0.096 |  |
| $v_{4,1}$ | 0.411    | 0.396            | 0.370 | 0.353 | 0.432 |  |
| $v_{6,1}$ | 0.479    | 0.497            | 0.520 | 0.537 | 0.472 |  |
| $v_{1,2}$ | 1.000    | 1.000            | 1.000 | 1.000 | 1.000 |  |
| $v_{4,3}$ | 0.006    | 0.006            | 0.004 | 0.005 | 0.014 |  |
| $v_{5,3}$ | 0.007    | 0.008            | 0.006 | 0.008 | 0.019 |  |
| $v_{7,3}$ | 0.048    | 0.052            | 0.035 | 0.044 | 0.132 |  |
| $v_{8,3}$ | 0.939    | 0.933            | 0.955 | 0.943 | 0.836 |  |
| $v_{5,4}$ | 0.014    | 0.015            | 0.015 | 0.018 | 0.022 |  |
| $v_{8,4}$ | 0.986    | 0.985            | 0.985 | 0.982 | 0.978 |  |
